# Supplementary material for: A systematic and prospectively validated approach for identifying synergistic drug combinations against malaria
Source: Springer Nature journal article supplement (doi:10.1186/s12936-018-2294-5), 2018-04-11
Supplement: MOESM1 [file 15611852]

**Table S2: Predicted synergistic compound combinations for malaria.** The predicted probability of being synergistic for each compound pair in **each strain**.

| <b>Compound 1</b> | <b>Compound 2</b> | <b>3D7</b> | <b>DD2</b> | <b>HB3</b> |
|-------------------|-------------------|------------|------------|------------|
| <b>ING</b>        | <b>HYD</b>        | 0.869      | 0.699      | 0.81       |
| <b>ING</b>        | <b>KIN</b>        | 0.86       | 0.703      | 0.805      |
| <b>ING</b>        | <b>JX4</b>        | 0.859      | 0.74       | 0.826      |
| <b>JX4</b>        | <b>MON</b>        | 0.859      | 0.531      | 0.65       |
| <b>RAL</b>        | <b>MON</b>        | 0.855      | 0.545      | 0.817      |
| <b>RAL</b>        | <b>MON</b>        | 0.855      | 0.545      | 0.817      |
| <b>MON</b>        | <b>HYD</b>        | 0.844      | 0.478      | 0.633      |
| <b>ING</b>        | <b>TAC</b>        | 0.82       | 0.674      | 0.854      |
| <b>FUL</b>        | <b>RAL</b>        | 0.792      | 0.739      | 0.825      |
| <b>FUL</b>        | <b>HYD</b>        | 0.788      | 0.747      | 0.734      |
| <b>API</b>        | <b>CHE</b>        | 0.765      | 0.731      | 0.423      |
| <b>FUL</b>        | <b>CHE</b>        | 0.756      | 0.742      | 0.758      |
| <b>THI</b>        | <b>API</b>        | 0.702      | 0.764      | 0.386      |
| <b>THI</b>        | <b>JX4</b>        | 0.418      | 0.753      | 0.297      |
| <b>THI</b>        | <b>PI8</b>        | 0.31       | 0.746      | 0.447      |
| <b>CHE</b>        | <b>ING</b>        | 0.843      | 0.724      | 0.816      |
| <b>CHR</b>        | <b>ING</b>        | 0.876      | 0.672      | 0.853      |
